1 **Local parasite pressures and host genotype may modulate epigenetic diversity in a**  
2 **mixed-mating fish**

Waldir M. Berbel-Filho<sup>1</sup>, Carlos Garcia de Leaniz<sup>1</sup>, Paloma Morán<sup>2</sup>, Jo Cable<sup>3</sup>, Sergio M. Q. Lima<sup>4</sup> and Sofia Consuegra<sup>1,\*</sup>

<sup>1</sup> Department of Biosciences, Swansea University, Swansea SA2 8PP, United Kingdom.

<sup>2</sup> Facultad de Biología, University of Vigo. Campus Universitario Lagoas-Marcosende, 36310 Vigo, Spain.

<sup>3</sup> School of Biosciences, Cardiff University, Cardiff CF10 3AX, United Kingdom.

<sup>4</sup> Laboratório de Ictiologia Sistemática e Evolutiva, Departamento de Botânica e Zoologia, Universidade Federal do Rio Grande do Norte, Natal 56078-970, Rio Grande do Norte, Brazil.

**\*Corresponding author:** email: [s.consuegra@swansea.ac.uk](mailto:s.consuegra@swansea.ac.uk)

**Running title:** Parasites, genetics and epigenetics in a mixed-mating fish

3 **Abstract**

4 Parasite-mediated selection is one of the main drivers of genetic variation in natural  
5 populations. The persistence of asexual reproduction and self-fertilization, however,  
6 challenges the notion that low genetic variation and inbreeding compromise the host's ability  
7 to respond to pathogens. DNA methylation represents a potential mechanism for generating  
8 additional adaptive variation under low genetic diversity. We compared genetic diversity  
9 (microsatellites and AFLPs), variation in DNA methylation (MSAFLPs), and parasite loads  
10 in three populations of *Kryptolebias hermaphroditus*, a unique mixed-mating (partially self-  
11 fertilising) fish, to analyse the potential adaptive value of DNA methylation in relation to  
12 genetic diversity and parasite loads. We found strong genetic population structuring, as well  
13 as differences in parasite loads and methylation levels among sampling sites and selfing  
14 lineages. Globally, the interaction between parasites and inbreeding with selfing lineages  
15 influenced DNA methylation, but parasites seemed more important in determining  
16 methylation levels at the local scale.

17

**Keywords:** epigenetic variation; hermaphroditism; self-fertilisation; inbreeding; local  
adaptation; mangrove killifish

18

## 19 **Introduction**

20 Organisms with mixed-mating reproduction (alternating between self-fertilisation and  
21 outcrossing) can benefit from the advantages of both biparental and uniparental reproduction:  
22 outcrossing generates genetic variability and adaptability potential, while selfing ensures  
23 reproduction without partners (Jarne and Chalesworth 1993). Reproductive assurance  
24 (Darwin 1876) gives self-reproducing individuals an advantage when colonising new  
25 environments (Baker 1955) and ensures the genetic transmission of both sets of parental  
26 genes (Fisher 1941). The downside of selfing, however, is that the progeny can have reduced  
27 fitness compared to their outcrossed counterparts, and suffer from inbreeding depression  
28 (Charlesworth and Willis 2009). Thus, occasional outcrossing should be beneficial when  
29 inbreeding can impair offspring fitness (Damgaard et al. 1992; Maynard Smith 1978).

30         The Red Queen hypothesis (Van Valen 1973; Bell 1982) is often invoked to explain  
31 the occurrence of sexual reproduction in face of the advantages of asexual reproduction (Blirt  
32 and Bell 1987; Lively 1987; Lively and Morran 2014). According to this hypothesis, the  
33 more genetically diverse offspring of sexually reproducing individuals provide a “moving  
34 target” to parasites, making it more difficult for them to adapt compared to the “more static”  
35 offspring of asexual/uniparental individuals (Maynard Smith 1978; Hamilton 1980; Lively et  
36 al. 1990;). Yet, while sexual reproduction seems the general rule in animals (approximately  
37 99%; Slowinski et al. 2016), asexual and self-fertilising lineages sometimes persist in a wide  
38 range of environments (Zhang et al. 2010), suggesting that their adaptation and long-term  
39 survival could be facilitated by other factors in addition to genetic variability (Verhoeven and  
40 Preite 2014).

41         Non-genetic factors (including epigenetic mechanisms) can play an important role in  
42 generating adaptive phenotypic variation (Bossdorf et al. 2008; Verhoeven et al. 2016;  
43 Bonduriansky and Day 2018), including resistance to parasites (Verhoeven et al. 2010;

44 Wenzel and Piertney 2014). Epigenetic mechanisms (e.g. histone modifications, microRNAs,  
45 DNA acetylation), can modulate changes in gene expression in response to environmental  
46 variation without involving changes in DNA sequence (Bossdorf et al. 2008; Richards et al.  
47 2017). DNA methylation is the best characterized epigenetic modification (Lea et al. 2017),  
48 and has important roles on pre-transcriptional control in several biological processes, such as  
49 cell differentiation and genomic imprinting (Koch et al. 2016). Variation in DNA methylation  
50 is not completely independent from the genome, and epialleles can have different degrees of  
51 autonomy from the genotype (Richards 2006; Dubin et al. 2015). In addition, in some plants  
52 and animals, individuals with low levels of heterozygosity display high levels of genome-  
53 wide DNA methylation variation (Richards et al. 2012; Schrey et al. 2012; Liebl et al. 2013),  
54 suggesting that DNA methylation could contribute to the adaptation of asexual and inbred  
55 organisms with limited genetic diversity to environmental change (Castonguay and Angers  
56 2012; Schrey et al. 2012; Liebl et al. 2013; Verhoeven and Preite 2014; Douhovnikoff and  
57 Dodd 2015).

58         Increasing evidence suggests that epigenetic mechanisms, including genome-wide  
59 DNA methylation, are involved in host-pathogen interactions (Gómez-Díaz et al. 2012; Hu et  
60 al. 2018), but the mechanisms are better known in plants than in animals (Annacondia et al.  
61 2018; Hewezi et al. 2018; Gómez-Díaz et al. 2012). Mixed-mating organisms represent ideal  
62 models to test the associations between genetic and epigenetic variation with pathogen  
63 pressures because selfed and outcrossed offspring naturally coexist, usually displaying very  
64 different levels of genetic diversity. Negative associations between genetic diversity and  
65 parasite loads have been previously observed in mixed-mating animals (Lively and Morran  
66 2014; Ellison et al. 2011), with inbred individuals usually harbouring more parasites. The  
67 relationship between epigenetic variation, parasites and mixed-mating, however, has not been  
68 explored.

69           Here, we compared genetic diversity, variation in DNA methylation, and parasite  
70 loads in three natural populations of the mixed-mating mangrove killifish *Kryptolebias*  
71 *hermaphroditus* distributed along the Brazilian coast (Tatarenkov et al. 2017). The genus  
72 *Kryptolebias* contains the only known mixed-mating vertebrate species (*K. marmoratus* and  
73 *K. hermaphroditus*), characterised by variable rates of selfing and outcrossing (Tatarenkov et  
74 al. 2017). Populations of both species consist mainly of self-fertilizing hermaphrodites and  
75 varying levels of males at low frequencies (Tatarenkov et al. 2017; Berbel-Filho et al. 2016),  
76 and exhibit high levels of homozygosity (Tatarenkov et al. 2009, 2017), suggesting that self-  
77 fertilization is the most common mode of reproduction (Avisé and Tatarenkov 2015).

78           We analysed microsatellites (previously shown to correlate with parasite loads in the  
79 closely related *K. marmoratus*, see Ellison et al. 2011) and genome-wide methylation based  
80 on identification of anonymous CpG by methylation-sensitive AFLP (MS-AFLPs, previously  
81 used in non-model organisms) to identify epigenetic variation associated to parasite loads  
82 (Wenzel and Piertney 2014). Based on the Red Queen Hypothesis and previous results in *K.*  
83 *marmoratus*, we expected lower genetic diversity and higher parasite loads in inbred  
84 compared to outbred individuals. We also predicted higher variation in DNA methylation in  
85 relation to inbreeding and parasite loads, if methylation played an adaptive role, potentially  
86 related to immunity, in *K. hermaphroditus*.

87

88 **Methods**

89 **Study system, field sampling and parasite screening**

90 A total of 128 specimens of *K. hermaphroditus* were collected using hand-nets from three  
91 sampling sites on isolated mangroves on the North-eastern coast of Brazil between January  
92 and September 2015: Ceará-Mirim river – Site 1; Curimataú river – Site 2; Ipojuca river -  
93 Site 3 (Fig. 1). *K. hermaphroditus* is distributed along the Brazilian coast (Tatarenkov et al.  
94 2017) and is typically found in shallow pools of high salinity levels (>30 ppt), clear waters  
95 and muddy substrates, where there are few other sympatric fish (Lira et al. 2015; Berbel-  
96 Filho et al. 2016). All specimens displayed the common hermaphrodite phenotype (dark  
97 colour with well-defined ocellus on the caudal fin; Costa 2011). Fish were euthanized using  
98 an overdose of tricaine methane-sulfonate (MS-222) following UK Home Office Schedule 1  
99 (Hollands 1986), standard length was measured using a digital calliper (mm) and the whole  
100 fish were preserved in 95% ethanol at -20 °C for parasite screening and DNA extraction.

101 In the laboratory, fish were dissected and screened for both external and internal parasite  
102 infections using a dissecting microscope following the methods of Ellison et al. (2011). To  
103 assess the reliability of parasite screening, a subsample of five fish was examined by a  
104 different observer and the agreement was 100%. We defined parasite loads using a scaled  
105 measure of parasite abundance, where for each parasite morphotype (i), the number of  
106 parasites per individual ( $N_i$ ) was divided by the maximum number found across all  
107 individuals ( $N_{imax}$ ). The final value of the scaled parasite load represents the sum of scaled  
108 parasite loads across all parasite types. Given their uneven abundance (Table 1), this  
109 approach minimizes bias when parasite loads are heavily influenced by a very abundant  
110 parasite type (in our case bacterial cysts) (Bolnick and Stutz 2017).

111

112

## 113 **Genetic analysis**

114 Genomic DNA from all 128 fish was extracted from gill tissue using a Nexttec extraction kit  
115 for blood and tissue samples (Nexttec, Leverkusen, Germany). Gills are an important  
116 physical and immunological barrier to pathogens in fish (Press and Evensen, 1999), and the  
117 organ where most parasites were found (Table 1). Twenty-seven microsatellite loci  
118 (Mackiewicz et al. 2006; Tatarenkov et al. 2017) were genotyped as in Ellison et al. (2011)  
119 and screened using GeneMapper v.4.0 (Applied Biosystems, Foster City, USA). Loci were  
120 tested for linkage disequilibrium and Hardy-Weinberg equilibrium using GENEPOP v. 4.5.1  
121 (Rousset 2008). Mean number of alleles per locus ( $N_{ma}$ ), observed heterozygosity ( $H_o$ ) and  
122 expected heterozygosity ( $H_e$ ) were estimated using GenALEX v. 6.5 (Peakall and Smouse  
123 2012). The inbreeding coefficient ( $F_{IS}$ ) was calculated in GENEPOP. Global heterozygosity  
124 for individual fish was estimated using the homozygosity by locus index (HL) implemented  
125 in the Excel macro Cernicalin v 1.3 (Aparicio et al. 2006).

126 We also used the Bayesian clustering algorithm INSTRUCT (Gao et al. 2007) to estimate the  
127 optimal number of selfing lineages ( $k$ ) with four simultaneous chains of 2,000,000 MCMC  
128 runs, 10 as thinning, and 100,000 of burn-in period, resulting in 100,000 interactions for each  
129 chain. The potential number of  $k$  tested ranged from 2 to 12. We used the individual  $q$ -values  
130 (the likelihood of membership to a particular genetic cluster or selfing lineage) from  
131 INSTRUCT to classify individuals as either selfed or outcrossed (Vähä and Primmer 2006). A  
132 threshold of  $q$ -value  $\geq 0.9$  was used to classify selfed individuals, while  $< 0.9$  represented  
133 hybrids between two different selfing lineages, suggesting an outcrossing event (Ellison et al.  
134 2011; Vähä and Primmer 2006). Pairwise  $F_{ST}$  values among sampling sites and selfing  
135 lineages were estimated with Arlequin v. 3.5.2.2 (Excoffier and Lischer 2010) using 10,000  
136 permutations. We used hierarchical analysis of molecular variance (AMOVA) to investigate  
137 population structuring among sampling sites and selfing lineages (according to individual  $q$ -

138 values) using 10,000 randomizations. Differences between selfed and outcrossed groups in  
139 the total number of parasites and homozygosity by locus (microsatellites) were analysed  
140 using median Mann-Whitney rank tests in R v. 3.3.

141

## 142 **Epigenetic analysis**

143 We used Methylation-Sensitive Amplified Fragment Length Polymorphisms (MS-AFLPs) to  
144 assess genome-wide DNA methylation patterns (Schrey et al. 2013). DNA extracted from gill  
145 filament tissue of 115 fish (33 classified as outcrossed and 82 as selfed according to the  
146 INSTRUCT *q*-values; 62, 36 and 17 from samplings sites 1, 2 and 3, respectively) was used  
147 for the MS-AFLPs analysis following Rodríguez López et al. (2012). A DNA aliquot of 100  
148 ng per individual was split for digestion with two enzyme combinations: EcoRI/HpaII and  
149 EcoRI/MspI. The digested DNA was ligated to adaptors and a selective PCR was conducted  
150 using the primers ECORI-ACT: GACTGCGTACCAATTCACT and HPA-TAG:  
151 GATGAGTCTAGAACGGTAG following Ellison et al. (2015). The HpaII primer was end-  
152 labelled with 6-FAM. Fragments were run on an ABI PRISM 3100 (Applied Biosystems) and  
153 the resultant profiles were analysed using GENEMAPPER v. 4.0 (Applied Biosystems). To  
154 ensure reproducibility the following settings were applied: analysis range was 100-500 bp;  
155 minimum peak height was 100 relative fluorescence units; pass range for sizing quality: 0.75-  
156 1.0; maximum peak width: 1.5 bp. To confirm MS-AFLP reproducibility, 24 individuals  
157 (~20% of the total; eight from each sampling site) were reanalysed and compared using the  
158 same protocols.

159 The R package msap v. 1. 1. 9 (Pérez-Figueroa 2013) was used to analyse MS-AFLP  
160 data. To increase reproducibility of the genotyping, we used an error threshold of 5% as  
161 suggested by Herrera and Bazaga (2010). According to the binary band patterns, each locus  
162 was classified as either methylation susceptible loci (MSL; i.e. displaying a proportion of



163 HPA+/MSP- and/or HPA-/MSP+ sites which exceed the error threshold (5%) across all  
164 samples) or non-methylated loci (NML; if the same patterns did not exceed the error  
165 threshold) (Pérez-Figueroa 2013). MSL were used to assess epigenetic variation, while NML  
166 were used as a measure of AFLP genetic variation. Average group methylation percentages  
167 for inbreeding status were calculated using the different binary band patterns  
168 (hemimethylated pattern (HPA+/MSP-) + internal cytosine methylation pattern (HPA-  
169 /MSP+)/unmethylated pattern (HPA+/MSP+) + hypermethylation/absence of target  
170 (HPA/MSP-) \*100) (Veerger et al. 2012).

171 Epigenetic (MSL) and genetic at AFLPs (NML) differentiation among sampling sites,  
172 selfing lineages and between outcrossed and selfed groups, was assessed by AMOVA with  
173 10,000 randomizations. Epigenetic (MSL) and genetic (AFLP and microsatellites)  
174 differentiation among sampling sites, selfing lineages and inbreeding status was visualized by  
175 principal coordinates analysis (PCoA). Mantel tests based on distance matrices (Mantel 1967)  
176 were used to test for potential correlations between epigenetic and genetic data for MSL,  
177 NML and microsatellites using GENALEX v. 6.5 with and 10,000 permutations. To identify  
178 disproportionately differentiated methylation states, we used a  $F_{ST}$  outlier approach  
179 implemented in Bayescan 2.1 (Foll and Gaggiotti 2008; Perez-Figueroa et al. 2010), with  
180  $2 \times 10^6$  iterations (thinning interval 20 after 20 pilot runs of  $10^4$  iterations each) and a burnin of  
181  $5 \times 10^5$ . We tested for outliers based on the MSL data generated on the comparisons among  
182 sampling sites, selfing lineages and between inbreeding status (inbred or outbred).

183

#### 184 **Statistical analyses**

185 A Kruskal-Wallis test was used to examine the differences on scaled parasite load and  
186 bacterial cysts (the most prominent parasite) among selfing lineages. To test the relationship  
187 between genome-wide variation in DNA methylation and parasite loads, the proportion of

188 methylated loci per individual was calculated as the proportion of loci scored as methylated  
189 over the total number of loci observed per individual (“0” for unmethylated and “1” for  
190 methylated, excluding the missing data cells per individual). We then employed a generalized  
191 linear model with a binomial link to model proportion of methylated loci as a function of  
192 scaled parasite load, selfing lineage, sampling site and inbreeding status. We repeated the  
193 analysis including only the most prominent parasite type (bacterial cysts).

194 Model selection was conducted using the multi-model averaging approach  
195 implemented in the R package *glmulti* v 1.0.7 (Calcagno and de Mazancourt 2010). We chose  
196 the minimal adequate models based on the lowest AICc values (Akaike Information Criterion  
197 corrected for small sample size), Akaike weight ( $W_i$ ) and evidence ratios (Burnham and  
198 Anderson 2004). Models (within 2 AIC units) were also reported. Predictors were checked  
199 for collinearity using *pair.panels* function in R package *psych* (Revelle et al. 2019). Model  
200 residuals were checked and assumptions validated.

201 To disentangle potential confounding effects arising from the unequal distribution of  
202 selfing lineages among sampling sites (i.e. five lineages are exclusive to a particular sampling  
203 site, Table S1), we repeated the analyses (AMOVA, Mantel test, PCoA and GLMs) for both  
204 genetic (microsatellites and AFLPs) and epigenetic (MSL) data using on individuals from  
205 Site 1 (68 individuals for microsatellites and 62 for MS-AFLPs), as this was the only site  
206 with more than two selfing lineages (Table S1).

## 207 **Results**

### 208 **Parasite screening**

209 Macroscopic parasite loads were generally low and we focused on the three most common  
210 types of parasites identified. Bacterial cysts were present on the gills and consisted of white  
211 to yellow spherical cysts circumscribed by a capsule, which resulted in hypertrophied gill  
212 filaments. They were the most common type of pathogen appearing in 83.6% of the

213 individuals screened, with a prevalence ranging from 1 to 19 (mean=2.73, s.d.=2.99), and  
214 were more prevalent in Site 1 (mean=3.16, s.d.=3.16), followed by Site 2 (mean=2.66,  
215 s.d.=3.10) and Site 3 (mean=1.27, s.d.=0.80). The second most common macroscopic  
216 parasites were protozoan cysts, which consisted of small dark oval cysts over the gills arch  
217 and filaments. In total, 19.53% of the total number of individuals were infected with these  
218 cysts, ranging from 1 to 6 (mean=0.54, s.d.=1.26). Protozoan cysts were absent in Site 1, but  
219 present in Site 2 (mean 1.52, s.d.=1.6) and Site 3 (mean=0.33, s.d.=1.37). Finally, adult  
220 nematodes were found in the gut of only eight individuals (6.25%), ranging from 1 to 3  
221 (mean=0.09, s.d.=0.40). Nematodes were only detected in Sites 1 (mean=0.3, s.d.=1.37) and  
222 2 (mean=0.02, s.d.=0.15) (Fig. S1; Tables 1 and S1). Only seven individuals (5.4%) were  
223 uninfected with macroparasites. Significant differences were found on scaled parasite loads  
224 (Chi square = 32.14,  $p < 0.001$ ,  $df = 5$ ) and bacterial cysts (Chi square = 12.98,  $p = 0.01$ ,  $df$   
225 = 5) among selfing lineages.

### 226 **Genetic diversity and population structuring based on microsatellites**

227 No linkage disequilibrium was detected between any pair of microsatellite loci. As expected  
228 from the high levels of self-fertilisation of the species, no loci were found to be in Hardy-  
229 Weinberg equilibrium, and all 27 microsatellite loci showed an excess of homozygotes. The  
230 global homozygosity index (HL) was very high (mean = 0.95), as well the estimated selfing  
231 rates (Table 1). At the individual level, 93 individuals (72.6%) were homozygous across all  
232 27 microsatellite loci. However, 17 individuals (13.28%), displayed intermediate to high  
233 levels of heterozygosity (ranging from 0.13 to 0.69).

234 The clustering Bayesian algorithm INSTRUCT indicated that six was the most likely  
235 number of selfing lineages (k). Selfing lineage 6 was shared between two different  
236 mangroves (Site 1 with seven individuals and site 2 with one individual), separated by  
237 approximately 100 km. The other five lineages were solely represented in one of the

238 mangroves (lineage 1 with 14 individuals, lineage 2 with 25 individuals and lineage 4 with 22  
239 individuals in Site 1; lineage 3 with 41 individuals in Site 2; and lineage 5 with 18 individuals  
240 in Site 3) (Figs. 1 and 2; Table S1). High  $F_{ST}$  values were found both among sampling sites  
241 (mean = 0.28, s.d. = 0.02) and selfing lineages (mean=0.32, s.d. = 0.05). All pairwise  
242 comparisons were highly significant (Table S2).

243         Based on the  $q$ -values from the INSTRUCT lineages, 92 fish (71%; 46 from Site 1, 30  
244 from Site 2, 16 from Site 3) were classified as selfed (with  $q$ -values  $\geq 0.9$ ) and 36 (29%; 22  
245 from Site 1, 12 from Site 2 and two in Site 3) as outcrossed (with  $q$ -values  $< 0.9$ ) (Fig. 2;  
246 Table S1). Overall, outcrossed individuals had significantly lower homozygosity by locus  
247 values (at microsatellites) and total parasite loads than selfed individuals (Table 2).

248         Overall, AMOVA analyses using microsatellites indicated strong and significant  
249 differentiation among sampling sites ( $F_{ST} = 0.28$ ,  $P = 0.001$ ) and selfing lineages ( $F_{ST} = 0.32$ ,  
250  $P = 0.001$ ), with the latter explaining more of the genetic variance than the former (Table 3).  
251 Although significant, very low genetic differentiation was found between selfed and  
252 outcrossed individuals ( $F_{ST} = 0.01$ ,  $P = 0.002$ ) (Table 3; Fig. S2). These patterns were also  
253 seen on PCoA analysis, with individuals generally clustering by selfing lineages in the  
254 microsatellites data (25.84% of overall variation), with individuals from lineage 4 being the  
255 most differentiated from the other lineages on Site 1. In this site, substantial overlap was  
256 found among selfing lineages and between selfed and outcrossed, despite its significant  
257 differences ( $F_{ST} = 0.03$ ,  $P = 0.001$ ) (Table S4; Fig. S3).

## 258 **Genetic and epigenetic variability and population structuring based on MS-AFLPs**

259 The epigenetic analysis identified 381 MS-AFLP loci, of which 267 (70.07%) were  
260 methylation-susceptible loci (MSL) and 106 (27.82%) non-methylated loci (NML). Of the  
261 MSL loci, 236 (88.3%) were polymorphic and therefore were used for the variability

262 analysis. Reproducibility comparisons between original and replicated genotypes for 24  
263 individuals revealed 262 loci with an average of 10% differences (sum of number of  
264 differences between first and second set of genotypes divided by number of individuals).  
265 AMOVA analysis for reproducibility revealed no significant differences between methylation  
266 and AFLP variation patterns between original and replicated set of individuals (Table S3).  
267 Average methylation ranged from 47.51% on lineage 2 to 38.17 % on lineage 5, and was  
268 44.82% for inbred and 45.77% for outbred individuals.

269 AMOVA revealed very low but significant differentiation among sampling sites, for  
270 both genetic (AFLPs:  $\square_{ST} = 0.02$ ,  $P = 0.001$ ) and epigenetic loci ( $\square_{ST} = 0.02$ ,  $P < 0.001$ ).  
271 Significant differentiation among selfing lineages was also found on genetic (AFLPs:  $\square_{ST} =$   
272  $0.02$ ,  $P = 0.004$ ) and epigenetic loci ( $\square_{ST} = 0.02$ ,  $P = 0.001$ ). Overall, higher genetic and  
273 epigenetic variance was found within than between groups (Table 3). As with microsatellites,  
274 no clear genetic (at AFLPs) or epigenetic differentiation was found between selfed and  
275 outcrossed individuals (Fig. S2). There was, however, a significant positive association  
276 between epigenetic (MSL) and genetic diversity, both using AFLPs (Mantel test,  $r = 0.11$ ;  $P$   
277  $= 0.002$ ) and microsatellites ( $r = 0.09$ ;  $P = 0.001$ ). No MSL epiloci were identified as an  $F_{ST}$   
278 outlier in any of the comparisons.

279 No significant differences between selfing lineages were found among lineages for  
280 individuals from Site 1 for AFLPs genetic data (selfing lineages:  $\square_{ST} = 0.008$ ,  $P = 0.12$ ) or  
281 MSL epigenetic data (selfing lineages:  $\square_{ST} = 0.006$ ,  $P = 0.20$ ) (Table S4). In the PCoA,  
282 substantial overlap was found among selfing lineages and between selfed and outcrossed  
283 individuals (Fig. S3). Mantel tests between genetic and epigenetic data indicated a significant  
284 positive association between AFLPs and MSL data ( $r = 0.21$ ;  $P < 0.001$ ), but not between  
285 microsatellites and MSL ( $r = -0.005$ ;  $P = 0.45$ ).

286

287

## 288 **Parasite loads, genetic and epigenetic variation**

289 According to a multi-model testing approach, the most plausible model for the proportion of  
290 methylated DNA included selfing lineage, scaled parasite load, inbreeding status and the  
291 interactions between selfing lineage and scaled parasite load and inbreeding. The proportion  
292 of methylated loci significantly varied among selfing lineages (estimate = 0.51, S. E.= 0.13, P  
293 < 0.001) and was affected by parasite loads and inbreeding status through its interactions with  
294 selfing lineage (parasite loads and selfing lineage: estimate = -0.55, S.E.=0.46, P = 0.005;  
295 inbreeding and selfing lineage interaction: estimate = -1.64, S.E.=0.14, P = 0.04) (Fig 3b-c;  
296 Tables 4 and S7). The second most likely model ( $\Delta AICc=1.00$ ) included only selfing lineage  
297 (estimate = -0.43, S. E.=0.08, P < 0.001) and the interactions between inbreeding and selfing  
298 lineage (estimate = -1.10, S. E.=0.12, P = 0.04) as significant predictors. However, this model  
299 explained substantially less of the overall variation compared to the first model (weight: 0.17  
300 vs. 0.28). and was 1.39 times less likely than the first one (Table S5).

301 Overall, the results of the single-taxa models (using number bacterial cysts) were very  
302 similar to those for scaled parasite loads. The best model to explain the proportion of  
303 methylated loci included selfing lineage, and the interactions between selfing lineage and  
304 bacterial cysts, and selfing lineage and inbreeding (Table S6).

305 When using only individuals from Site 1 (to remove any potential confounding effect  
306 between sampling site and selfing lineages) for the proportion of methylated loci the model  
307 with the lowest AIC indicated that selfing lineage, inbreeding and the interactions between  
308 inbreeding and selfing lineage and inbreeding and scaled parasite loads were all significant

309 predictors (Table S7). However, the second best-fitting model ( $\Delta\text{AICc} = 0.02$ ) explained the  
310 same amount of variation (weight=0.39) and the evidence ratio (-0.66) suggested that it was  
311 more likely (evidence ratio of 1.50) than the first model. This second model indicated that  
312 overall, the proportion of methylated DNA significantly increased with scaled parasite loads  
313 (estimate = 0.43, S. E.= 0.11, P = 0.03) and that DNA methylation levels were also affected  
314 by the interaction between scaled parasite loads and inbreeding (estimate = -1.29, S. E.=0.38,  
315 P <0.001), with inbred individuals having increased methylation levels with increased  
316 parasite loads, while outbred individuals had decreased methylation levels with increased  
317 parasite loads (Fig. 3d; Table 4).

## 318 **Discussion**

319 Overall, our results did not indicate significant differences in genome-wide DNA methylation  
320 variation between selfed and outcrossed individuals, and our models only identified  
321 inbreeding significantly related to DNA methylation via its interaction with selfing lineage  
322 (all sampling sites) and parasites (at the local scale in Site 1). Higher variation in DNA  
323 methylation has been reported for clonal and inbred individuals (Nakamura and Hosaka 2010;  
324 Massicotte and Angers 2012; Richards et al. 2012; Liebl et al. 2013; Veerger et al. 2012), and  
325 has been interpreted as an adaptive mechanism to compensate for low genetic variation  
326 (Schrey et al. 2012), or as a potential consequence of inbreeding (as in Veerger et al. 2012)  
327 responsible, at least in part, for inbreeding depression (Nakamura and Hosaka 2010; Veerger  
328 et al. 2012). Yet, our results suggest that, at least in this species, either inbreeding does not  
329 affect genome-wide DNA methylation variation or it does in a gene-specific manner (Venney  
330 et al. 2016), although further research would be needed to address this question.

331 We found that that the different selfing lineages of *Kryptolebias hermaphroditus*  
332 distributed in three sampling sites of north-eastern Brazil differed significantly in parasite  
333 loads and genetic composition, which might indicate specific interactions between host

334 genotypes and parasites (Dybdhal and Lively 1998; Ebert 2008). Previous studies on  
335 mangrove killifishes had identified extensive genetic structuring both between (Tatarenkov et  
336 al. 2015; 2017) and within mangrove systems even at close geographical proximity  
337 (Tatarenkov et al. 2007; 2012; Ellison et al. 2012), as a consequence of the self-fertilising  
338 nature of these fish. We found strong evidence of genetic structuring between sampling sites  
339 and selfing lineages using microsatellites, but lower differentiation for AFLP genetic markers  
340 (likely due to the different mutation rate of the markers) and epigenetic markers (MS-  
341 AFLPs). Overall, inbred individuals (with lower heterozygosity) harboured higher parasite  
342 loads than their outcrossed counterparts, supporting the prediction that low genetic diversity  
343 due to self-fertilisation may reduce fitness (considering parasite loads as a proxy for pathogen  
344 pressure), as for other mixed-mating species (King et al. 2011; Ellison et al. 2011; Lively and  
345 Morran 2014). Extensive periods of self-fertilisation can reduce offspring fitness due to the  
346 accumulation of deleterious alleles and inbreeding depression (Charlesworth et al. 1993).  
347 Species with mixed-mating seem to overcome these problems through occasional outcrossing  
348 (Ellison et al. 2011; Morran et al. 2011), which can generate genetic diversity to face natural  
349 enemies, such as parasites (Lively 2014). Here, the relationship between parasites and  
350 inbreeding status (selfed or outcrossed) suggests that outcrossing might confer a fitness  
351 advantage (in terms of parasite loads), even when it occurs at very low frequencies (Ellison et  
352 al. 2011). However, despite the adaptive potential of outcrossing, the main reproductive  
353 strategy of *K. hermaphroditus* seems to be self-fertilisation (Tatarenkov et al. 2017). This  
354 suggests that other evolutionary mechanisms may be balancing the harmful effects of parasite  
355 infections, or that parasite selection is of low (Lively 2014), as theory predicts that low  
356 selection levels imposed by natural enemies are consistent with the maintenance of asexual  
357 reproduction (Ladle et al. 1993; Judson 1997). For example, in the mixed-mating  
358 *Potamopyrgus* snails, the oldest asexual lineages are restricted to populations where parasites



359 are rare (Neiman et al. 2005). Thus, the low number of parasites found in *K. hermaphroditus*  
360 (i.e. mean of 3.38 parasites per individual compared to 22.41 of *K. marmoratus* in Belize;  
361 Ellison et al. 2011), may explain the high prevalence of selfing in *K. hermaphroditus*. The  
362 long-term persistence of self-fertilising organisms suggests that non-genetic mechanisms may  
363 play a role in generating adaptive responses to environmental change and compensate for low  
364 genetic variation (Shrey et al. 2012; Liebl et al. 2013; Douhovnikoff and Dodd 2015; Hu et  
365 al. 2018). Using data from all sampling sites, we found that genome-wide DNA methylation  
366 was strongly influenced by selfing lineage and only at a smaller scale by inbreeding through  
367 its interaction with selfing lineage (Bell et al. 2011; Bjornsson et al. 2008; Gertz et al. 2011;  
368 Dubin et al. 2015). Strong epigenetic differences between selfing lines had been identified  
369 previously in *K. marmoratus* (see Ellison et al. 2015), indicating an important role of the  
370 genetic background in the epigenetic variation of these species. In addition, we also found a  
371 significant correlation between DNA methylation and genetic variation (at both AFLP and  
372 microsatellites data), suggesting that autonomous variation in DNA methylation may be  
373 limited in this study system (Dubin et al. 2015).

374 DNA methylation can interact with genotypes in a genotype-by-environment manner  
375 to generate plastic responses (Herman and Sultan 2016). Several abiotic and biotic factors,  
376 including parasites (Norouzitallab et al. 2014; Hu et al. 2018), are known to influence DNA  
377 methylation, however information on how DNA methylation varies across different genetic  
378 backgrounds is still scarce. Our results showed that genome-wide DNA methylation levels  
379 for all sampling sites were significantly influenced by parasite loads through the interaction  
380 with selfing lineage, suggesting a potential genotype-by-environment interaction on parasites  
381 responses. Yet, as most of the selfing lineages were exclusive to specific sampling sites, we  
382 could completely discard confounding effects between both variables. In fact, selfing lineage  
383 did not affect genome-wide DNA methylation levels in Site 1, but only parasites and their

384 interaction with inbreeding status. The anonymous nature of our genetic and epigenetic  
385 markers is a limiting factor to infer the potential adaptive/functional role of the DNA  
386 methylation variation in response to parasites. Further analyses, ideally under controlled  
387 experimental conditions and using higher resolution sequencing methods (i.e. whole-genome  
388 bisulfite sequencing, RNAseq), should help to clarify how reduced DNA methylation may  
389 affect immune responses in mixed-mating *Kryptolebias* species.

390         The relationship between parasite loads and outcrossing seems to be common to  
391 several mixed-mating species (Steets et al. 2007; Ellison et al. 2011; King et al. 2011) in  
392 addition to *K. hermaphroditus*, suggesting that the influence of parasites in the regulation of  
393 mixed-mating could be generalised. The extent of this relationship, however, may depend on  
394 the severity of the selection imposed by coevolving parasites (Lively and Morran 2014). Our  
395 results indicate that genotype composition (and its interaction with inbreeding) may be  
396 important in DNA methylation responses to environmental variation in wild populations, and  
397 that, if DNA methylation responded in a genotypic-specific manner to parasites pressures, it  
398 could contribute to local adaptation (Foust et al. 2016; Smith et al. 2016). The mangrove  
399 killifish, with its naturally inbred populations and marked methylation differences between  
400 populations and genotypes, represents an ideal model to analyse the relative roles of genetic  
401 and epigenetic diversity in modulating local adaptation.

#### 402 **Acknowledgements**

403 This work was supported by the Conselho Nacional de Desenvolvimento Científico e  
404 Tecnológico (CNPq) through a Science without Borders scholarship (233161/2014-7). This  
405 work was also funded by the National Geographic/Waitt foundation grant (W461-16). We  
406 thank Amy Ellison for the help with parasite screening. We are thankful for the LISE  
407 laboratory team and CTA facilities from Universidade Federal do Rio Grande do Norte for  
408 support during fieldwork.

409

410 **Compliance with ethical standards**

411 All the experiments in this study have been conducted following Home Office regulations,  
412 approved by Swansea, Cardiff and UFRN (CEUA) Universities Animal Ethics Committees,  
413 and under sampling permit number 30532-1/2011 issued by ICMBio/SISBIO. The authors  
414 declare they have no conflict of interest.

415

416 **Data availability**

417 Data available from Dryad Digital Repository: <https://doi.org/XXX/XXXX>

418 **Authors contributions**

419 SC, WMB-F & CGL conceived the work; SMLQ planned the field work and conducted the  
420 sampling together with WMB-F, CGL & SC; WMB-F did the microsatellite and parasite  
421 screening, with contributions from JC; WMB-F and PM performed the MS-AFLP analyses.  
422 WMB-F analysed the data with the contribution of SC, CGL and PM. WMB-F and SC wrote  
423 the paper with contributions from all authors.

424

425 **References**

426 Annacondia ML, Mageroy MH, Martinez G (2018) Stress response regulation by epigenetic  
427 mechanisms: changing of the guards. *Physiol Plant* 162: 239-250.

428 <https://doi.org/10.1111/ppl.12662>

429 Aparicio JM, Ortego J, Cordero PJ (2006) What should we weigh to estimate heterozygosity,

430 alleles or loci? *Mol Ecol* 15: 4659-4665. <https://doi.org/10.1111/j.1365->

431 [294X.2006.03111.x](https://doi.org/10.1111/j.1365-294X.2006.03111.x)

432 Asselman J, De Coninck DI, Vandegheuchte MB, Jansen M, Decaestecker E, De Meester L,

433 et al. (2015) Global cytosine methylation in *Daphnia magna* depends on genotype,

- 434 environment, and their interaction. *Environ Toxicol Chemi* 34:1056-1061.  
435 <https://doi.org/10.1002/etc.2887>
- 436 Avise JC, Tatarenkov A (2015) Population genetics and evolution of the mangrove rivulus  
437 *Kryptolebias marmoratus*, the world's only self-fertilizing hermaphroditic vertebrate. *J*  
438 *Fish Biol* 87: 519-538. <https://doi.org/10.1111/jfb.12741>
- 439 Baker HG (1955) Self-compatibility and establishment after “long-distance” dispersal.  
440 *Evolution* 9: 347-349. <http://dx.doi.org/10.2307/2405656>
- 441 Bell, G. (1982). *The Masterpiece of Nature: the evolution and genetics of sexuality*.  
442 University of California Press: Berkeley.
- 443 Bell J T, Pai AA, Pickrell JK, Gaffney DJ, Pique-Regi R, Degner JF, et al. (2011). DNA  
444 methylation patterns associate with genetic and gene expression variation in HapMap  
445 cell lines. *Genome Biol* 12:R10. <https://doi.org/10.1186/gb-2011-12-1-r10>
- 446 Berbel-Filho WM, Espirito-Santo HMV, Lima SMQ (2016) First record of a male of  
447 *Kryptolebias hermaphroditus* Costa, 2011 (Cyprinodontiformes: Cynolebiidae). *Neotrop*  
448 *Ichthyol* 14: e160024. <http://dx.doi.org/10.1590/1982-0224-20160024>
- 449 Bjornsson HT, Sigurdsson MI, Fallin M, Irizarry RA, Aspelund T, Cui H, et al. (2008). Intra-  
450 individual change over time in DNA methylation with familial clustering. *JAMA*  
451 299:2877-2883. doi:10.1001/jama.299.24.2877
- 452 Blirt A, Bell G (1987) Mammalian chiasma frequencies as a test of two theories of  
453 recombination. *Nature* 326: 803. <https://doi.org/10.1038/326803a0>
- 454 Bolnick DI, Stutz WE (2017) Frequency dependence limits divergent evolution by favouring  
455 rare immigrants over residents. *Nature* 546: 285. <https://doi.org/10.1038/nature22351>

- 456 Bonduriansky R, Day T. *Extended Heredity: a new understanding of inheritance and*  
457 *evolution*. Princeton University Press: Princeton.
- 458 Bossdorf O, Richards CL, Pigliucci M (2008) Epigenetics for ecologists. *Ecol Lett* 11: 106-  
459 115. <https://doi.org/10.1111/j.1461-0248.2007.01130.x>
- 460 Burnham KP, Anderson DR (2004) Multimodel inference - understanding AIC and BIC in  
461 model selection. *Sociol Method Res* 33: 261-304.  
462 <https://doi.org/10.1177/0049124104268644>
- 463 Calcagno V, de Mazancourt C (2010) glmulti: An R package for easy automated model  
464 selection with (generalized) linear models. *J Stat Softw* 34: 1-29.  
465 <http://dx.doi.org/10.18637/jss.v034.i12>
- 466 Carius HJ, Little TJ, Ebert D (2001) Genetic variation in a host-parasite association: potential  
467 for coevolution and frequency-dependent selection. *Evolution* 55: 1136-1145.  
468 <https://doi.org/10.1111/j.0014-3820.2001.tb00633.x>
- 469 Castonguay E, Angers B (2012) The key role of epigenetics in the persistence of asexual  
470 lineages. *Gen Res Int* 2012: 534289. <http://dx.doi.org/10.1155/2012/534289>
- 471 Charlesworth D, Willis JH (2009) The genetics of inbreeding depression. *Nat Rev Genet* 10:  
472 783-796. <https://doi.org/10.1038/nrg2664>
- 473 Costa WJEM (2011) Identity of *Rivulus ocellatus* and a new name for a hermaphroditic  
474 species of *Kryptolebias* from south-eastern Brazil (Cyprinodontiformes: Rivulidae).  
475 *Ichthyol Explor Fres* 22: 185-192.
- 476 Damgaard C, Couvet D, Loeschcke V (1992) Partial selfing as an optimal mating strategy.  
477 *Heredity* 69: 289-295. <https://doi.org/10.1038/hdy.1992.127>
- 478 Darwin C (1876). *Cross and self-fertilization of plants*. Murray, London.

- 479 Douhovnikoff V, Dodd RS (2015) Epigenetics: a potential mechanism for clonal plant  
480 success. *Plant Ecol* 216: 227-233. <https://doi.org/10.1007/s11258-014-0430-z>
- 481 Downen RH, Pelizzola M, Schmitz RJ, Lister R, Downen JM, Nery JR et al (2012) Widespread  
482 dynamic DNA methylation in response to biotic stress. *P Natl Acad Sci USA* 109:  
483 E2183-E2191. <https://doi.org/10.1073/pnas.1209329109>
- 484 Dubin MJ, Zhang P, Meng D, Remifereau MS, Osborne EJ, Casale PF et al. (2015) DNA  
485 methylation in *Arabidopsis* has a genetic basis and shows evidence of local adaptation.  
486 *eLife* 4, e05255. <https://doi.org/10.7554/eLife.05255.001>
- 487 Dybdahl MF, Lively CM (1998) Host-parasite coevolution: evidence for rare advantage and  
488 time-lagged selection in a natural population. *Evolution* 52: 1057-1066.  
489 <https://doi.org/10.1111/j.1558-5646.1998.tb01833.x>
- 490 Ebert D (2008) Host-parasite coevolution: insights from the *Daphnia*-parasite model system.  
491 *Curr Opin Microbiol* 11:290-301. <https://doi.org/10.1016/j.mib.2008.05.012>
- 492 Ellison A, Cable J, Consuegra S (2011) Best of both worlds? Association between  
493 outcrossing and parasite loads in a selfing fish. *Evolution* 65: 3021-3026.  
494 <https://doi.org/10.1111/j.1558-5646.2011.01354.x>
- 495 Ellison A, Lopez CMR, Moran P, Breen J, Swain M, Megias M et al (2015) Epigenetic  
496 regulation of sex ratios may explain natural variation in self-fertilization rates. *Proc*  
497 *Royal Soc B* 282: 20151900. <https://doi.org/10.1098/rspb.2015.1900>
- 498 Ellison A, Wright P, Taylor DS, Cooper C, Regan R, Currie S et al (2012) Environmental  
499 diel variation, parasite loads, and local population structuring of a mixed-mating  
500 mangrove fish. *Ecol Evol* 2:1682-1695. <https://doi.org/10.1002/ece3.289>

- 501 Excoffier L, Lischer HEL (2010) Arlequin suite ver 3.5: a new series of programs to perform  
502 population genetics analyses under Linux and Windows. *Mol Ecol Resour* 10: 564-567.  
503 <https://doi.org/10.1111/j.1755-0998.2010.02847.x>
- 504 Fisher RA (1941) Average excess and average effect of a gene substitution. *Ann Eugen* 11:  
505 53-63. <https://doi.org/10.1111/j.1469-1809.1941.tb02272.x>
- 506 Foll M, Gaggiotti O (2008) A genome-scan method to identify selected loci appropriate for  
507 both dominant and codominant markers: a Bayesian perspective. *Genetics*, 180: 977-993.  
508 <https://doi.org/10.1534/genetics.108.092221>
- 509 Foust CM, Preite V, Schrey AW, Alvarez M, Robertosn MH, Verhoeven KJF et al. (2016)  
510 Genetic and epigenetic differences associated with environmental gradients in replicate  
511 populations of two salt marsh perennials. *Mol Ecol* 25: 1639-1652.  
512 <https://doi.org/10.1111/mec.13522>
- 513 Gao H, Williamson S, Bustamante CD (2007) A Markov chain Monte Carlo approach for  
514 joint inference of population structure and inbreeding rates from multilocus genotype  
515 data. *Genetics* 176: 1635-1651. <https://doi.org/10.1534/genetics.107.072371>
- 516 Gertz J, Varley KE, Reddy TE, Bowling KM, Pauli F, Parker SL, Kucera KS, et al. (2011).  
517 Analysis of DNA methylation in a three-generation family reveals widespread genetic  
518 influence on epigenetic regulation. *PLOS Genetics* 7:e1002228.  
519 <https://doi.org/10.1371/journal.pgen.1002228>
- 520 Gómez-Díaz E, Jordà M, Peinado MA, Rivero A (2012) Epigenetics of host–pathogen  
521 interactions: the road ahead and the road behind. *PLoS Pathog* 8: e1003007.  
522 <https://doi.org/10.1371/journal.ppat.1003007>

- 523 Gugger PF, Fitz-Gibbon S, PellEgrini M, Sork VL (2016) Species-wide patterns of DNA  
524 methylation variation in *Quercus lobata* and their association with climate gradients. Mol  
525 Ecol 25:1665-1680. <https://doi.org/10.1111/mec.13563>
- 526 Hamilton WD (1980) Sex versus non-sex versus parasite. Oikos 35: 282-290.  
527 <https://doi.org/10.2307/3544435>
- 528 Herman JJ, Sultan SE (2016) DNA methylation mediates genetic variation for adaptive  
529 transgenerational plasticity. Proc R Soc B 283: 20160988.  
530 <https://doi.org/10.1098/rspb.2016.0988>
- 531 Herrera CM, Bazaga P (2010) Epigenetic differentiation and relationship to adaptive genetic  
532 divergence in discrete populations of the violet *Viola cazorlensis*. New Phytol 187: 867–  
533 876. <https://doi.org/10.1111/j.1469-8137.2010.03298.x>
- 534 Hewezi T, Pantalone V, Bennett M, Neal Stewart C, Jr., Burch-Smith TM (2018)  
535 Phytopathogen-induced changes to plant methylomes. Plant Cell Rep 37: 17-23.  
536 <https://doi.org/10.1007/s00299-017-2188-y>
- 537 Hollands C (1986) The Animals (scientific procedures) Act 1986. Lancet 2: 32-33.
- 538 Hu J, Pérez-Jvostov F, Blondel L, Barrett RD (2018) Genome-wide DNA methylation  
539 signatures of infection status in Trinidadian guppies (*Poecilia reticulata*). Mol Ecol 27:  
540 3087-31022018. <https://doi.org/10.1111/mec.14771>
- 541 Judson OP (1997) A model of asexuality and clonal diversity: cloning the red queen. J Theor  
542 Biol 186: 33-40. <https://doi.org/10.1006/jtbi.1996.0339>
- 543 King KC, Jokela J, Lively CM (2011) Parasites, sex, and clonal diversity in natural snail  
544 populations. Evolution 65: 1474-1481. <https://doi.org/10.1111/j.1558-5646.2010.01215.x>



- 545 Koch IJ, Clark MM, Thompson MJ, Deere-Machemer KA, Wang J, Duarte L et al (2016)  
546 The concerted impact of domestication and transposon insertions on methylation patterns  
547 between dogs and grey wolves. *Mol Ecol* 25: 1838-1855.  
548 <https://doi.org/10.1111/mec.13480>
- 549 Ladle RJ, Johnstone RA, Judson OP (1993) Coevolutionary dynamics of sex in a  
550 metapopulation - escaping the Red Queen. *Proc Royal Soc B* 253: 155-160.  
551 <https://doi.org/10.1098/rspb.1993.0096>
- 552 Le TN, Schumann U, Smith NA, Tiwari S, Au PCK, Zhu QH et al (2014) DNA demethylases  
553 target promoter transposable elements to positively regulate stress responsive genes in  
554 *Arabidopsis*. *Genome Biol* 15. <https://doi.org/10.1186/S13059-014-0458-3>
- 555 Lea AJ, Altmann J, Alberts SC, Tung J (2016) Resource base influences genome-wide DNA  
556 methylation levels in wild baboons (*Papio cynocephalus*). *Mol Ecol* 25: 1681-1696.  
557 <https://doi.org/10.1111/mec.13436>
- 558 Lea AJ, Vilgalys TP, Durst PAP, Tung J (2017) Maximizing ecological and evolutionary  
559 insight in bisulfite sequencing data sets. *Nat Ecol Evol* 1: 1074-1083.  
560 <https://doi.org/10.1038/s41559-017-0229-0>
- 561 Liebl AL, Schrey AW, Richards CL, Martin LB (2013) Patterns of DNA methylation  
562 throughout a range expansion of an introduced songbird. *Integr Comp Biol* 53: 351-358.  
563 <https://doi.org/10.1093/icb/ict007>
- 564 Lins LSF, Trojahn S, Sockell A, Yee MC, Tatarenkov A, Bustamante CD et al (2018) Whole-  
565 genome sequencing reveals the extent of heterozygosity in a preferentially self-fertilizing  
566 hermaphroditic vertebrate. *Genome* 61: 241-247. <https://doi.org/10.1139/gen-2017-0188>

- 567 Lira MGS, de Paiva REC, Ramos TPA, Lima SM (2015) First record of *Kryptolebias*  
568 *hermaphroditus* Costa, 2011 (Cyprinodontiformes: Rivulidae) in the extreme north  
569 Atlantic Forest mangroves, Rio Grande do Norte state, Brazil. Check List 11: 1656.  
570 <http://dx.doi.org/10.15560/11.3.1656>
- 571 Lively CM (1987) Evidence from a New-Zealand snail for the maintenance of sex by  
572 parasitism. Nature 328: 519-521. <https://doi.org/10.1038/328519a0>
- 573 Lively CM, Craddock C, Vrijenhoek RC (1990) Red Queen hypothesis supported by  
574 parasitism in sexual and clonal fish. Nature 344: 864. <https://doi.org/10.1038/344864a0>
- 575 Lively CM, Morran LT (2014) The ecology of sexual reproduction. J Evolution Biol 27:  
576 1292-1303. <https://doi.org/10.1111/jeb.12354>
- 577 Mackiewicz M, Tatarenkov A, Perry A, Martin JR, Elder Jr JF, Bechler DL et al (2006)  
578 Microsatellite documentation of male-mediated outcrossing between inbred laboratory  
579 strains of the self-fertilizing mangrove killifish (*Kryptolebias marmoratus*). J Hered 97:  
580 508-513. <https://doi.org/10.1093/jhered/esl017>
- 581 Mantel N (1967) The detection of disease clustering and a generalized regression approach.  
582 Cancer Res 27: 209-220.
- 583 Massicotte R, Angers B (2012) General-purpose genotype or how epigenetics extend the  
584 flexibility of a genotype. Gen Res Int <http://dx.doi.org/10.1155/2012/317175>
- 585 Massicotte R, Whitelaw E, Angers B (2011) DNA methylation: a source of random variation  
586 in natural populations. Epigenetics 6: 421-427. <https://doi.org/10.4161/epi.6.4.14532>
- 587 Mishra PK, Baum M, Carbon J (2011) DNA methylation regulates phenotype-dependent  
588 transcriptional activity in *Candida albicans*. P Natl Acad Sci USA 108: 11965-11970.  
589 <https://dx.doi.org/10.1073/pnas.1109631108>

- 590 Morran LT, Schmidt OG, Gelarden IA, Parrish RC, and Lively CM (2011) Running with the  
591 Red Queen: host-parasite coevolution selects for biparental sex. *Science* 333:216-218.  
592 [https://doi.org/ 10.1126/science.1206360](https://doi.org/10.1126/science.1206360)
- 593 Nakamura S, Hosaka K (2010) DNA methylation in diploid inbred lines of potatoes and its  
594 possible role in the regulation of heterosis. *Theor Appl Gen* 120: 205-214.  
595 <https://doi.org/10.1007/s00122-009-1058-6>
- 596 Neiman M, Jokela J, Lively CM (2005) Variation in asexual lineage age in *Potamopyrgus*  
597 *antipodarum*, a New Zealand snail. *Evolution* 59: 1945-1952.
- 598 Norouzitallab P, Baruah K, Vandegehuchte M, Van Stappen G, Catania F, Vanden Bussche J,  
599 et al. (2014) Environmental heat stress induces epigenetic transgenerational inheritance  
600 of robustness in parthenogenetic *Artemia* model. *FASEB J* 28:3552-3563.
- 601 Peakall R, Smouse PE (2012) GenAlEx 6.5: genetic analysis in Excel. Population genetic  
602 software for teaching and research--an update. *Bioinformatics* 28: 2537-2539.  
603 <https://doi.org/10.1093/bioinformatics/bts460>
- 604 Pérez-Figueroa A, García-Pereira M, Saura M, Rolán-Alvarez E, Caballero A (2010)  
605 Comparing three different methods to detect selective loci using dominant markers. *J*  
606 *Evolution Biol* 23: 2267-2276. <https://doi.org/10.1111/j.1420-9101.2010.02093.x>
- 607 Perez-Figueroa A (2013) msap: a tool for the statistical analysis of methylation-sensitive  
608 amplified polymorphism data. *Mol Ecol Resour* 13: 522-527.  
609 <https://doi.org/10.1111/1755-0998.12064>
- 610 Press CM, Evensen O (1999) The morphology of the immune system in teleost fishes. *Fish*  
611 *Shellfish Immunol* 9: 309-318. <https://doi.org/10.1006/fsim.1998.0181>

- 612 Raja P, Sanville BC, Buchmann RC, Bisaro DM (2008) Viral genome methylation as an  
613 epigenetic defense against geminiviruses. *J Virol* 82: 8997-9007.  
614 <https://doi.org/10.1128/Jvi.00719-08>
- 615 Revelle, W. (2019). Package 'psych' - The R Project for Statistical Computing. Available at:  
616 <https://cran.r-project.org/web/packages/psych/psych.pdf>
- 617 Richards CL, Alonso C, Becker C, Bossdorf O, Bucher E, Colome-Tatche M et al (2017)  
618 Ecological plant epigenetics: Evidence from model and non-model species, and the way  
619 forward. *Ecol Lett* 20: 1576-1590. <https://doi.org/10.1111/ele.12858>
- 620 Richards CL, Schrey AW, Pigliucci M (2012) Invasion of diverse habitats by few Japanese  
621 knotweed genotypes is correlated with epigenetic differentiation. *Ecol Lett* 15: 1016-  
622 1025. <https://doi.org/10.1111/j.1461-0248.2012.01824.x>
- 623 Rodríguez López CM, Moran P, Lago F, Espineira M, Beckmann M, Consuegra S (2012)  
624 Detection and quantification of tissue of origin in salmon and veal products using  
625 methylation sensitive AFLPs. *Food Chem* 131: 1493-1498.  
626 <https://doi.org/10.1016/j.foodchem.2011.09.120>
- 627 Rodriguez-Negrete E, Lozano-Duran R, Piedra-Aguilera A, Cruzado L, Bejarano ER,  
628 Castillo AG (2013) Geminivirus Rep protein interferes with the plant DNA methylation  
629 machinery and suppresses transcriptional gene silencing. *New Phytol* 199: 464-475.  
630 <https://doi.org/10.1111/nph.12286>
- 631 Rousset F (2008) GENEPOP '007: a complete re-implementation of the GENEPOP software  
632 for Windows and Linux. *Mol Ecol Resour* 8: 103-106. [https://doi.org/10.1111/j.1471-  
633 8286.2007.01931.x](https://doi.org/10.1111/j.1471-8286.2007.01931.x)

- 634 Schrey AW, Alvarez M, Foust CM, Kilvitis HJ, Lee JD, Liebl AL et al (2013) Ecological  
635 epigenetics: beyond MS-AFLP. *Integr Comp Biol* 53: 340-350.  
636 <https://doi.org/10.1093/icb/ict012>
- 637 Schrey AW, Coon CA, Grispo MT, Awad M, Imboma T, McCoy ED et al (2012) Epigenetic  
638 variation may compensate for decreased genetic variation with introductions: a case  
639 study using house sparrows (*Passer domesticus*) on two continents. *Gen Res Int* 2012:1-  
640 7. <http://dx.doi.org/10.1155/2012/979751>
- 641 Slowinski SP, Morran LT, Parrish RC, Cui ER, Bhattacharya A, Lively CM, Phillips PC  
642 (2016) Coevolutionary interactions with parasites constrain the spread of self-  
643 fertilization into outcrossing host populations. *Evolution* 70:2632-2639.  
644 <https://doi.org/10.1111/evo.13048>
- 645 Smith TA, Martín MD, Nguyen M, Mendelson TC (2016) Epigenetic divergence as a  
646 potential first step in darter speciation. *Mol Ecol* 25: 1883-1894.  
647 <https://doi.org/10.1111/mec.13561>
- 648 Steets JA, Wolf DE, Auld JR, Ashman TL (2007) The role of natural enemies in the  
649 expression and evolution of mixed mating in hermaphroditic plants and animals.  
650 *Evolution* 61: 2043-2055. <https://doi.org/10.1111/j.1558-5646.2007.00184.x>
- 651 Tatarenkov A, Earley RL, Perlman BM, Taylor DS, Turner BJ, Avise JC (2015) Genetic  
652 subdivision and variation in selfing rates among central american populations of the  
653 mangrove rivulus, *Kryptolebias marmoratus*. *The Journal of heredity* 106: 276-284.  
654 [10.1093/jhered/esv013](https://doi.org/10.1093/jhered/esv013)

- 655 Tatarenkov A, Earley RL, Taylor DS, Avise JC (2012) Microevolutionary distribution of  
656 isogenicity in a self-fertilizing fish (*Kryptolebias marmoratus*) in the Florida Keys.  
657 Integr Comp Biol 52: 743-752. [10.1093/icb/ics075](https://doi.org/10.1093/icb/ics075)
- 658
- 659 Tatarenkov A, Gao H, Mackiewicz M, Taylor DS, Turner BJ, Avise JC (2007) Strong  
660 population structure despite evidence of recent migration in a selfing hermaphroditic  
661 vertebrate, the mangrove killifish (*Kryptolebias marmoratus*). Molecular ecology 16:  
662 2701-2711. [10.1111/j.1365-294X.2007.03349.x](https://doi.org/10.1111/j.1365-294X.2007.03349.x)
- 663 Tatarenkov A, Lima SMQ, Earley RL, Berbel-Filho WM, Vermeulen FBM, Taylor DS et al  
664 (2017) Deep and concordant subdivisions in the self-fertilizing mangrove killifishes  
665 (*Kryptolebias*) revealed by nuclear and mtDNA markers. Biol J Linn Soc 122: 558-578.  
666 <https://doi.org/10.1093/biolinnean/blx103>
- 667 Tatarenkov A, Lima SMQ, Taylor DS, Avise JC (2009) Long-term retention of self-  
668 fertilization in a fish clade. P Natl Acad Sci USA 106: 14456-14459.  
669 <https://doi.org/10.1073/pnas.0907852106>
- 670 Taylor DS (2012) Twenty-Four Years in the mud: What have we learned about the natural  
671 history and ecology of the mangrove rivulus, *Kryptolebias marmoratus*? Integr Comp  
672 Biol 52: 724-736. <https://doi.org/10.1093/icb/ics062>
- 673 Teh AL, Pan H, Chen L, Ong M-L, Dogra S, Wong J et al (2014) The effect of genotype and  
674 in utero environment on interindividual variation in neonate DNA methylomes. Genome  
675 research 24: 1064-1074.

- 676 Toenshoff ER, Kvellestad A, Mitchell SO, Steinum T, Falk K, Colquhoun DJ et al (2012) A  
677 novel betaproteobacterial agent of gill epitheliocystis in seawater farmed Atlantic  
678 Salmon (*Salmo salar*). Plos One 7. <https://doi.org/10.1371/journal.pone.0032696>
- 679 Vähä JP, Primmer CR (2006) Efficiency of model-based Bayesian methods for detecting  
680 hybrid individuals under different hybridization scenarios and with different numbers of  
681 loci. Mol Ecol, 15:63-72. <https://doi.org/10.1111/j.1365-294X.2005.02773.x>
- 682 Van Valen L (1973). A new evolutionary law. Evol Theory 1:1–30.
- 683 Venney CJ, Johansson ML, Heath DD (2016) Inbreeding effects on gene-specific DNA  
684 methylation among tissues of Chinook salmon. Mol Ecol 25: 4521-4533.  
685 <https://doi.org/10.1111/mec.13777>
- 686 Vergeer P, Wagemaker N, Ouborg NJ (2012) Evidence for an epigenetic role in inbreeding  
687 depression. Biol Letters 8: 798-801. <https://doi.org/10.1098/rsbl.2012.0494>
- 688 Verhoeven KJF, Jansen JJ, van Dijk PJ, Biere A (2010) Stress-induced DNA methylation  
689 changes and their heritability in asexual dandelions. New Phytol 185: 1108-1118.  
690 <https://doi.org/10.1111/j.1469-8137.2009.03121.x>
- 691 Verhoeven KJF, Preite V (2014) Epigenetic variation in asexually reproducing organisms.  
692 Evolution 68: 644-655. <https://doi.org/10.1111/evo.12320>
- 693 Verhoeven KJF, Vonholdt BM, Sork VL (2016) Epigenetics in ecology and evolution: what  
694 we know and what we need to know. Mol Ecol 25: 1631-1638.  
695 <https://doi.org/10.1111/mec.13617>
- 696 Wenzel MA, Piertney SB (2014) Fine-scale population epigenetic structure in relation to  
697 gastrointestinal parasite load in red grouse (*Lagopus lagopus scotica*). Mol Ecol 23:  
698 4256-4273. <https://doi.org/10.1111/mec.12833>

- 699 Weyrich A, Lenz D, Jeschek M, Chung TH, Rübensam K, Göritz F et al (2016) Paternal  
700 intergenerational epigenetic response to heat exposure in male Wild guinea pigs. *Mol*  
701 *Ecol* 25:1729-1740. <https://doi.org/10.1111/mec.13494>
- 702 Willi Y, Määttänen K (2011). The relative importance of factors determining genetic drift:  
703 mating system, spatial genetic structure, habitat and census size in *Arabidopsis lyrata*.  
704 *New Phytol* 189:1200-1209. <https://doi.org/10.1111/j.1469-8137.2010.03569.x>
- 705 Yu A, Lepere G, Jay F, Wang JY, Bapaume L, Wang Y et al (2013) Dynamics and biological  
706 relevance of DNA demethylation in *Arabidopsis* antibacterial defense. *P Natl Acad Sci*  
707 *USA* 110: 2389-2394. <https://doi.org/10.1073/pnas.1211757110>
- 708 Zhang YY, Zhang DY, and Barrett SCH (2010). Genetic uniformity characterizes the  
709 invasive spread of water hyacinth (*Eichhornia crassipes*), a clonal aquatic plant. *Mol*  
710 *Ecol* 19:1774–1786. <https://doi.org/10.1111/j.1365-294X.2010.04609.x>



711 **Tables**

712 **Table 1** Genetic diversity (at 27 microsatellite loci), mean parasites number (standard  
 713 deviation in brackets) and parasite prevalence in *Kryptolebias hermaphroditus* at sampling  
 714 sites in North-eastern Brazil. N= sampling size;  $N_a$  = mean number of alleles of alleles;  $H_e$  =  
 715 expected heterozygosity;  $H_o$  = observed heterozygosity;  $F_{IS}$  = inbreeding coefficient; HL =  
 716 homozygosity by locus; S = selfing rates.

717

|                                                       | Site 1      | Site 2      | Site 3      | All sites   |
|-------------------------------------------------------|-------------|-------------|-------------|-------------|
| <b>Genetic diversity</b>                              |             |             |             |             |
| N                                                     | 68          | 42          | 18          | 128         |
| $N_a$                                                 | 3.03        | 3.44        | 3.14        | 3.21        |
| $H_e$                                                 | 0.28        | 0.26        | 0.33        | 0.295       |
| $H_o$                                                 | 0.025       | 0.015       | 0.043       | 0.028       |
| $F_{IS}$                                              | 0.91        | 0.94        | 0.87        | 0.93        |
| HL                                                    | 0.95        | 0.97        | 0.93        | 0.95        |
| S                                                     | 0.92        | 0.93        | 0.87        | 0.90        |
| <b>Parasite loads</b>                                 |             |             |             |             |
| Bacterial gills cysts                                 | 3.16 (3.16) | 2.66 (3.10) | 1.27 (0.80) | 2.73 (2.99) |
| Protozoan gills cysts                                 | 0           | 1.52 (1.60) | 0.33 (1.37) | 0.54 (1.26) |
| Nematodes                                             | 0.16 (0.53) | 0.02 (0.15) | 0           | 0.09 (0.40) |
| Total parasite load                                   | 3.33 (3.27) | 4.21 (3.17) | 1.61 (1.73) | 3.38 (3.17) |
| <b>Parasite prevalence (% of fish with infection)</b> |             |             |             |             |
| Bacterial gills cysts                                 | 91.17       | 71.42       | 83.33       | 83.59       |
| Protozoan gills cysts                                 | 0           | 57.14       | 5.55        | 19.53       |
| Nematodes                                             | 10.29       | 2.38        | 0           | 6.25        |

718 **Table 2** Homozygosity by locus (HL) (at 27 microsatellite loci), mean parasites loads  
 719 (standard error in brackets) and parasite prevalence in *Kryptolebias hermaphroditus* classed as  
 720 either selfed or outcrossed based on q-values from selfing lineages structure estimated using  
 721 INSTRUCT. P and z-values extracted from a two median Mann-Whitney test.

|                                                       | <b>Selfed</b> | <b>Outcrossed</b> | <b>z</b> | <b>P value</b>   |
|-------------------------------------------------------|---------------|-------------------|----------|------------------|
| <b>Genetic diversity</b>                              |               |                   |          |                  |
| N                                                     | 92            | 36                |          |                  |
| HL                                                    | 0.98          | 0.88              | -4.76    | <b>&lt;0.001</b> |
| <b>Parasite loads</b>                                 |               |                   |          |                  |
| Bacterial gills cysts                                 | 3.25 (2.99)   | 1.69 (2.59)       |          |                  |
| Protozoan gills cysts                                 | 0.57 (1.26)   | 0.47 (1.28)       |          |                  |
| Nematodes                                             | 0.1 (0.4)     | 0.05 (0.42)       |          |                  |
| Total parasite load                                   | 3.82 (3.47)   | 2.25 (1.94)       | -2.84    | <b>0.004</b>     |
| <b>Parasite prevalence (% of fish with infection)</b> |               |                   |          |                  |
| Bacterial gills cysts                                 | 89.13         | 69.44             |          |                  |
| Protozoan gills cysts                                 | 18.47         | 22.22             |          |                  |
| Nematodes                                             | 7.6           | 2.77              |          |                  |

722

723

724

725

726 **Table 3** Hierarchical analysis of molecular variance (AMOVA) for microsatellites and MS-AFLPs data among **a** sampling sites **b** selfing  
 727 lineages and **c** between selfed and outcrossed individuals and **b** among sampling sites in *Kryptolebias hermaphroditus*. df= degrees of freedom;  
 728 SSD= sum of squared deviations; Mol. var. (%) = molecular variance percentages from variance components sigma 2;  $\Phi_{ST}$  = Phi statistics for  
 729 population differentiation. *P* value derived from 10,000 permutations.

|                           | Microsatellites |               |                 |                | NML |               |             |                | MSL |               |             |                  |
|---------------------------|-----------------|---------------|-----------------|----------------|-----|---------------|-------------|----------------|-----|---------------|-------------|------------------|
|                           | df              | Mol. var. (%) | F <sub>ST</sub> | <i>P</i> value | df  | Mol. var. (%) | $\Phi_{ST}$ | <i>P</i> value | df  | Mol. var. (%) | $\Phi_{ST}$ | <i>P</i> value   |
| <b>a Sampling sites</b>   |                 |               |                 |                |     |               |             |                |     |               |             |                  |
| Among sites               | 2               | 28.46         | 0.28            | <b>0.001</b>   | 2   | 2.20          | 0.02        | <b>0.001</b>   | 2   | 2.96          | 0.02        | <b>&lt;0.001</b> |
| Within sites              | 227             | 71.54         |                 |                | 112 | 97.80         |             |                | 112 | 97.05         |             |                  |
| <b>b Selfing lineages</b> |                 |               |                 |                |     |               |             |                |     |               |             |                  |
| Among lineages            | 5               | 32.40         | 0.32            | <b>0.001</b>   | 5   | 2.00          | 0.02        | <b>0.004</b>   | 5   | 2.15          | 0.02        | <b>0.001</b>     |

|                               |     |       |      |              |     |       |      |      |     |       |      |      |
|-------------------------------|-----|-------|------|--------------|-----|-------|------|------|-----|-------|------|------|
| Within lineages               | 250 | 67.60 |      |              | 109 | 98.00 |      |      | 109 | 97.85 |      |      |
| <b>c Inbreeding status</b>    |     |       |      |              |     |       |      |      |     |       |      |      |
| Between selfed and outcrossed |     | 1.28  | 0.01 | <b>0.002</b> | 1   | 0.15  | 0.02 | 0.32 | 1   | 0.82  | 0.02 | 0.06 |
| Within selfed and outcrossed  |     | 98.72 |      |              | 113 | 99.85 |      |      | 113 | 99.18 |      |      |

730

---

731

732

733 **Table 4** Results of the best-fitting generalized linear models for proportion of methylated loci  
734 (binomial distribution) in *Kryptolebias hermaphroditus*, using the multi-model averaging  
735 approach (see appendix for the full model comparisons). df= degrees of freedom; Coeff =  
736 mean coefficient estimates.  
737

| <b>Independent variable</b>                     | <b>df</b> | <b>Coeff</b> | <b>z</b> | <b>P-value</b>   |
|-------------------------------------------------|-----------|--------------|----------|------------------|
| <b>Proportion of methylated loci</b>            |           |              |          |                  |
| Selfing lineage                                 | 5         | -0.51        | -4.50    | <b>&lt;0.001</b> |
| Scaled parasite load                            | 1         | -0.02        | -0.02    | 0.83             |
| Inbreeding                                      | 1         | -0.50        | 1.73     | 0.15             |
| Selfing lineage x parasite scaled               | 5         | -0.55        | -3.90    | <b>0.005</b>     |
| Selfing lineage x inbreeding                    | 4         | -1.64        | -1.64    | <b>0.04</b>      |
| <b>Proportion of methylated loci for site 1</b> |           |              |          |                  |
| Scaled parasite load                            | 1         | -0.23        | -11.49   | <b>0.03</b>      |
| Inbreeding                                      | 1         | -0.31        | -10.64   | 0.09             |
| Inbreeding x scaled parasite load               | 1         | -1.87        | -17.93   | <b>&lt;0.001</b> |

738  
739  
740  
741  
742  
743  
744  
745  
746

747 **Figure legends**

748 **Fig. 1** Sampling locations for *Kryptolebias hermaphroditus* (picture of a live individual on  
749 the top-right corner) in North-eastern Brazil. Ceará-Mirim river – Site 1; Curimataú river –  
750 Site 2; Ipojuca river - Site 3.

751 **Fig. 2** Genetic assignment of *Kryptolebias hermaphroditus* to six selfing lineages using  
752 INSTRUCT. Each individual is represented by a bar, which represents the likelihood of the  
753 individual to belong to a specific genetic cluster (colour).

754 **Fig. 3** Relationships between **a** scaled parasite load across selfing lineages and inbreeding  
755 status **b** proportion of methylated loci across selfing lineage and inbreeding status (selfed or  
756 outcrossed) **c** Proportion of methylated loci and selfing lineages and scaled parasite loads **d**  
757 proportion of methylated loci across inbreeding status for sampling site 1 individuals. Circles  
758 for selfed, triangles for outcrossed individuals. Red = selfing lineage 1 (site 1); salmon =  
759 selfing lineage 2 (site 1); green = selfing lineage 3 (site 2); brown = selfing lineage 4 (site 1);  
760 yellow = selfing lineage 5 (site 3); purple = selfing lineage 6 (sites 1 and 2); orange =  
761 outcrossed individuals; blue = selfed individuals.

36° W

34° W

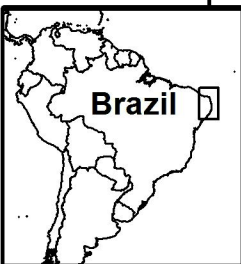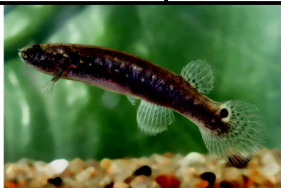

Site 1

Site 2

Site 3

6° S

8° S

Atlantic ocean

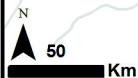

Mangroves

A solid green square followed by the text "Mangroves".

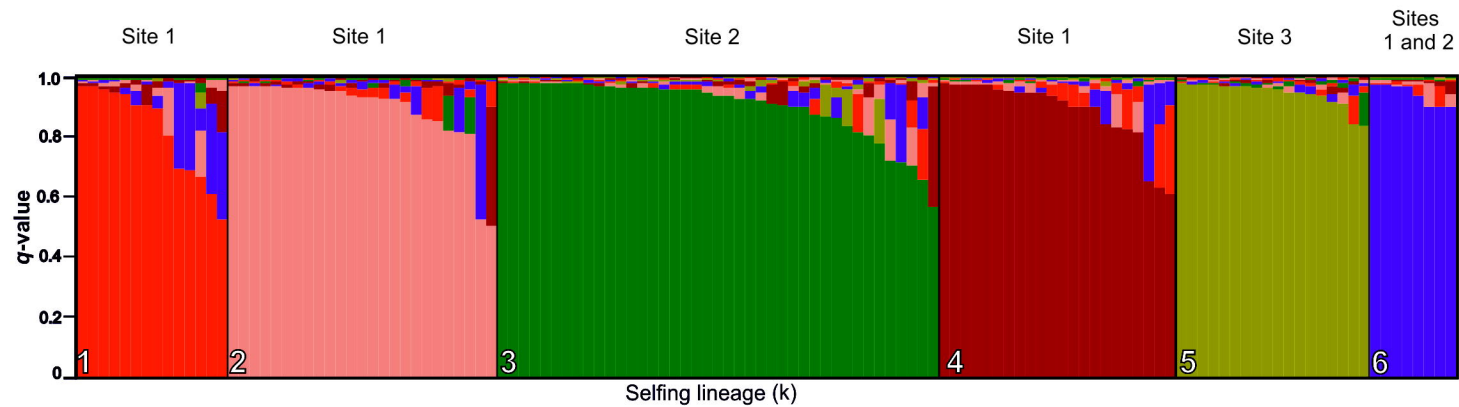



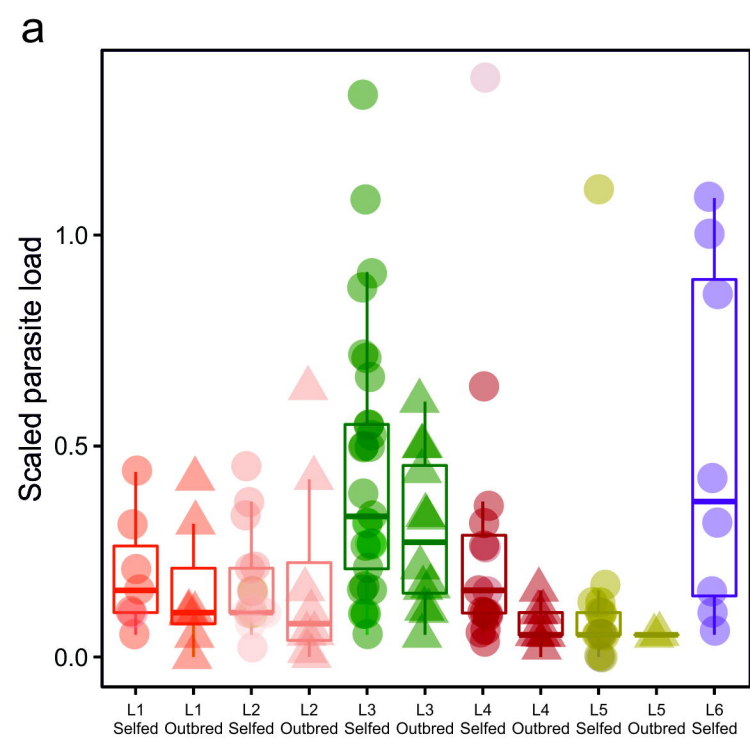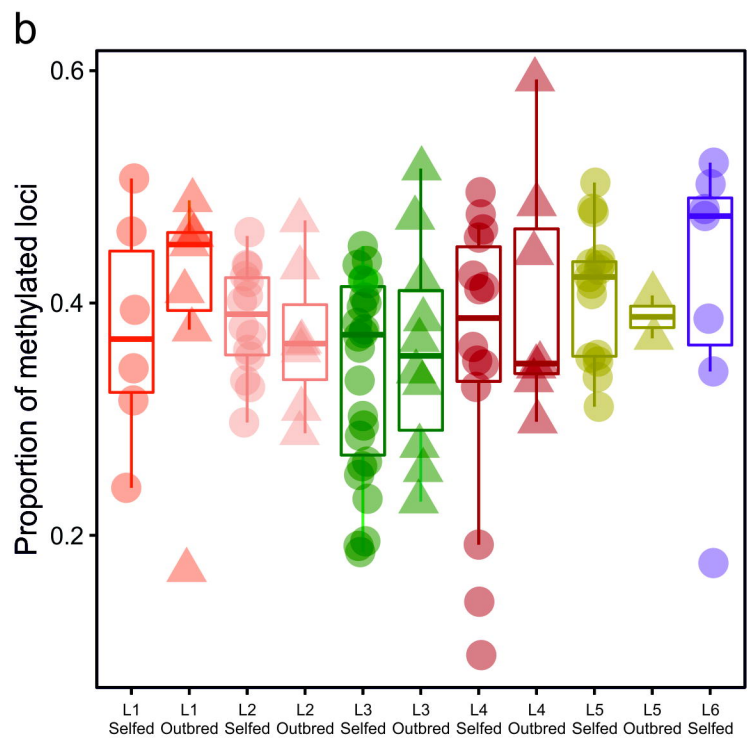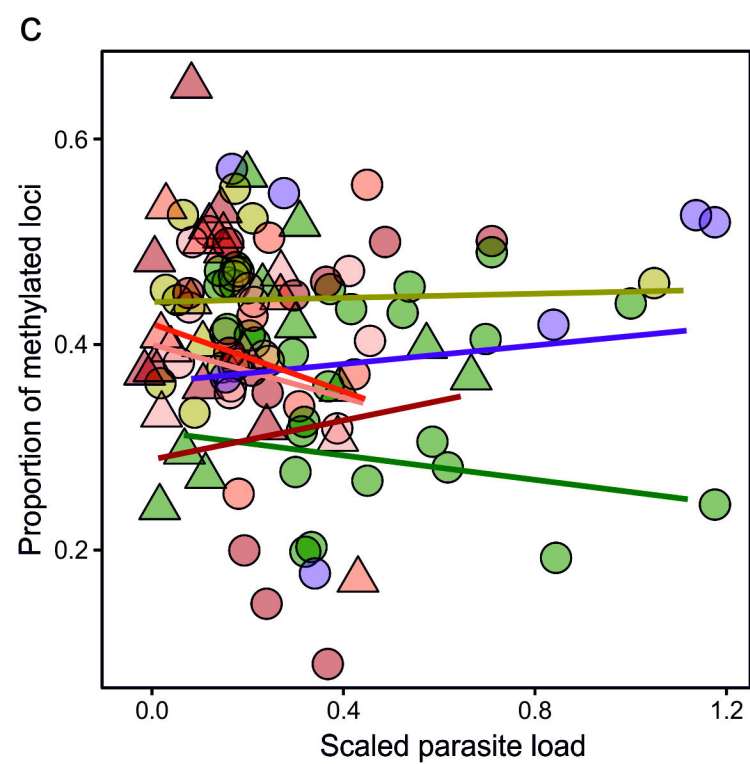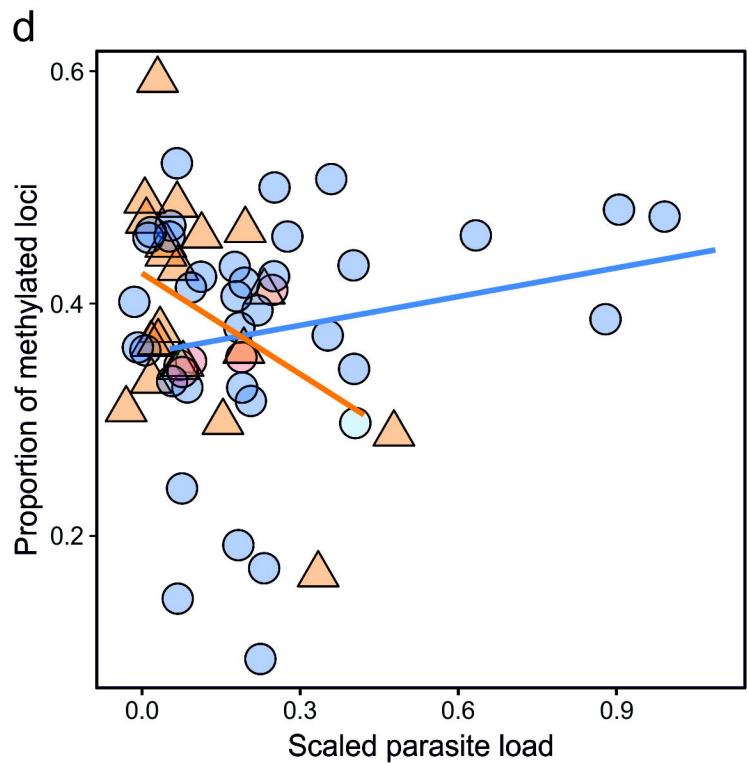

Source: http://biorxiv.org/content/10.1101/603274v1.full.pdf
